# Supplementary material
Source: PubMed Central journal article supplement (PMC7662495)

## Supplementary Online Content

Subhi Y, Schmidt DC, Al-Bakri M, Bach-Holm D, Kessel L. Diagnostic test accuracy of the red reflex test for ocular pathology in infants: a meta-analysis. *JAMA Ophthalmol*. Published online November 12, 2020. doi:10.1001/jamaophthalmol.2020.4854

**eMethods 1.** Literature Search in Different Databases

**eMethods 2.** Details of Data Analysis

**eTable 1.** Methods for Index and Reference Test in Included Studies

**eTable 2.** Risk of Bias Within Individual Studies

**eTable 3.** Sensitivity Analyses of the Bivariate Meta-analysis of the Diagnostic Test Accuracy of the Red Reflex on Detecting Any Ocular Pathology

**eTable 4.** Sensitivity Analyses of the Bivariate Meta-analysis of the Diagnostic Test Accuracy of the Red Reflex on Detecting Any Medical or Surgical Intervention–Demanding Ocular Pathology

**eFigure 1.** Calculated Summary Prevalence Estimate of Any Ocular Pathology, Risk of Bias Across Studies, and Sensitivity Analyses

**eFigure 2.** Calculated Summary Prevalence Estimate of Medical or Surgical Intervention–Demanding Ocular Pathology, Risk of Bias Across Studies, and Sensitivity Analyses

**eFigure 3.** Hierarchical Summary Receiver Operating Characteristics Model (HSROC) Curve for Evaluating the Association Between Sensitivity and Specificity for the Red Reflex in Identifying Ocular Pathology

This supplementary material has been provided by the authors to give readers additional information about their work.

**eMethods 1.** Literature Search in Different Databases.

**PubMed:**

**History**

[Download history](#)[Clear history](#)

| Search | Add to builder      | Query                                                       | Items found         | Time     |
|--------|---------------------|-------------------------------------------------------------|---------------------|----------|
| #1     | <a href="#">Add</a> | Search ("red reflex" OR "Brückner test" OR "Bruckner test") | <a href="#">236</a> | 09:54:23 |

**Cochrane Central:**

21 **Trials matching** "red reflex" OR "Brückner test" OR "Bruckner test" in Title Abstract Keyword - (Word variations have been searched)

[Cochrane Central Register of Controlled Trials](#)

Issue 4 of 12, April 2020

**EMBASE:**

| Search history sorted by search number ascending |                                                                                                                                                                                                                                                    |         |          |                                                         |             |  |
|--------------------------------------------------|----------------------------------------------------------------------------------------------------------------------------------------------------------------------------------------------------------------------------------------------------|---------|----------|---------------------------------------------------------|-------------|--|
| # ▲                                              | Searches                                                                                                                                                                                                                                           | Results | Type     | Actions                                                 | Annotations |  |
| 1                                                | ("red reflex" or "Brückner test" or "Bruckner test").mp.<br>[mp=title, abstract, heading word, drug trade name, original title, device manufacturer, drug manufacturer, device trade name, keyword, floating subheading word, candidate term word] | 306     | Advanced | <a href="#">Display Results</a><br><a href="#">More</a> |             |  |

**ClinicalTrials.gov:**

9 Studies found for: "red reflex" OR "Brückner test" OR "Bruckner test"

ClinicalTrials.gov Search Results 04/19/2020

| Title                                                                                                                                     | Status                 | Study Results        | Conditions                                                                                                                              | Interventions                                                                                 | Locations                                                                                                                                                                                                                                                                                                   |
|-------------------------------------------------------------------------------------------------------------------------------------------|------------------------|----------------------|-----------------------------------------------------------------------------------------------------------------------------------------|-----------------------------------------------------------------------------------------------|-------------------------------------------------------------------------------------------------------------------------------------------------------------------------------------------------------------------------------------------------------------------------------------------------------------|
| 1<br><a href="#">Anterior Chamber Illumination in Cataract Surgery for Eyes With Poor Red Reflex</a>                                      | Completed              | No Results Available | •Cataract Senile                                                                                                                        | •Procedure: Anterior chamber illumination in cataract surgery                                 | •Alexandria university, Alexandria, Egypt                                                                                                                                                                                                                                                                   |
| 2<br><a href="#">Pediatric Red Reflex Study</a>                                                                                           | Recruiting             | No Results Available | •Abnormal Vitreous Humor Morphology<br>•Abnormal Choroid Morphology<br>•Optic Nerve Diseases<br>•Retinal Disease<br>•Retinal Hemorrhage | •Diagnostic Test: Direct ophthalmoscope                                                       | •Children's National Medical Center, Washington, District of Columbia, United States                                                                                                                                                                                                                        |
| 3<br><a href="#">Determination of the Sensitivity and Specificity of a Smartphone Application to Detect Retinoblastoma</a>                | Active, not recruiting | No Results Available | •Retinoblastoma<br>•Cataracts Infantile<br>•Glaucoma, Congenital<br>•Leucocoria                                                         | •Other: CRADLE<br>•Other: Red reflex testing                                                  | •St. Jude Children's Research Hospital, Memphis, Tennessee, United States                                                                                                                                                                                                                                   |
| 4<br><a href="#">Comparative Validation of "Blinq" and "ZWIN" Vision Screeners</a>                                                        | Completed              | No Results Available | •Strabismic Amblyopia<br>•Refractive Amblyopia<br>•Strabismus                                                                           | •Diagnostic Test: objective pediatric vision screen, "blinq,"                                 | •Alaska Children's EYE & Strabismus, Anchorage, Alaska, United States                                                                                                                                                                                                                                       |
| 5<br><a href="#">Reduced Infant Response to a Routine Care Procedure After Glucose 25% Analgesia in Comparison to Materna RTF Stage 1</a> | Unknown status         | No Results Available | •Infant, Newborn, Diseases                                                                                                              | •Drug: Glucose 25%<br>•Dietary Supplement: Materna RTF Stage 1<br>•Other: Water for Injection | •NICU Department, The Baruch Padeh medical Center - Poriya, Tiberias, Israel                                                                                                                                                                                                                                |
| 6<br><a href="#">Lofeprednol vs Prednisolone for the Treatment of Intraocular Inflammation Following Cataract Surgery in Children</a>     | Completed              | Has Results          | •Cataract                                                                                                                               | •Drug: Lofeprednol etabonate<br>•Drug: Prednisolones acetate                                  | •Bausch & Lomb Inc, Rochester, New York, United States                                                                                                                                                                                                                                                      |
| 7<br><a href="#">Reduced Infant Response To A Routine Care Procedure After Glucose 25% Analgesia</a>                                      | Terminated             | No Results Available | •Infant<br>•Newborn Diseases                                                                                                            | •Drug: Glucose 25%                                                                            |                                                                                                                                                                                                                                                                                                             |
| 8<br><a href="#">Cataract Surgery With Intracameral Triamcinolone in Infants</a>                                                          | Completed              | No Results Available | •Cataract                                                                                                                               | •Drug: Triamcinolone acetonide<br>•Drug: Prednisolone syrup                                   | •Alino Ventura Foundation, Recife, Pernambuco, Brazil                                                                                                                                                                                                                                                       |
| 9<br><a href="#">Screening Aid to Identify Corneas That May Have Pathologies or Other Conditions</a>                                      | Completed              | No Results Available | •Corneal Diseases                                                                                                                       |                                                                                               | •Shiley Eye Center-University of California San Diego, La Jolla, California, United States<br>•Carmel Mountain Vision Care Center, San Diego, California, United States<br>•Dishier Laser Institute, Greenwood Village, Colorado, United States<br>•Pacific University, Forest Grove, Oregon, United States |

U.S. National Library of Medicine | U.S. National Institutes of Health | U.S. Department of Health & Human Services

**CINAHL:**

Sunday, April 19, 2020 10:16:28 AM

| #  | Query                                                 | Limiters/Expanders                                                                  | Last Run Via                                                                                                    | Results |
|----|-------------------------------------------------------|-------------------------------------------------------------------------------------|-----------------------------------------------------------------------------------------------------------------|---------|
| S1 | TX "red reflex" OR "Brückner test" OR "Bruckner test" | Expanders - Apply equivalent subjects<br>Search modes - Proximity within five words | Interface - EBSCOhost<br>Research Databases<br>Search Screen - Advanced Search<br>Database - CINAHL<br>Complete | 272     |

**Combined search into following databases: Web of Science (WOS), BIOSIS Previews (BIOSIS), Current Contents Connect (CCC), Data Citation Index (DRCI), Derwent Innovations Index (DIIDW), KCI-Korean Journal Database (KJD), Russian Science Citation Index (RSCI), SciELO Citation Index (SCIELO):**

**Results: 371**

(from All Databases)

**You searched for: TOPIC:** ("red reflex" OR "Brückner test" OR "Bruckner test")

**Timespan:** All years. **Databases:** WOS, BIOSIS, CCC, DRCI, DIIDW, KJD, RSCI, SCIELO.

Search language=Auto

## **eMethods 2.** Details of Data Analysis

We presented 2x2 data with 95% confidence intervals (95% CI) for sensitivity and specificity. To account for the correlation between sensitivity and specificity, we analyzed results based on an approach to fit random effects using the hierarchical summary receiver operating characteristics model (SROC). The hierarchical SROC model accounts for the across study variability and estimates summary accuracy measures of sensitivity and specificity. For this analysis, we used MetaDTA version 1.45.<sup>9</sup> We conducted sensitivity analyses for all analyses by excluding each study in turn and re-calculating summary estimates to evaluate the overall robustness of the findings. Using the hierarchical SROC model, we interpreted the summary sensitivity and specificity point to reflect the average observed accuracy.<sup>10</sup> We made a separate subgroup analysis to evaluate the diagnostic test accuracy of intervention demanding ocular pathology among the cases reported as defined by a senior pediatric ophthalmologist (L.K.). Unit of assessment was per person investigated. This strategy was chosen since the evaluation of the red reflex on one eye to some extent may depend on the red reflex on the other eye. For studies where data per person was not possible to extract, we extracted data per eye.

To provide context into diagnostic test accuracy estimates, we also evaluated the prevalence of any ocular pathologies and intervention demanding ocular pathologies. We conducted prevalence meta-analyses using MetaXL 5.3 (EpiGear International, Sunrise Beach, QLD, Australia) for Microsoft Excel 2013. A random-effects model was employed to account for potential heterogeneity between studies. To avoid variance instability, which can be an issue in prevalence meta-analyses, we transformed all prevalence numbers using the double arcsine method for analysis and then back-transformed for interpretation.<sup>11</sup> Heterogeneity was evaluated using Cochran's Q and I<sup>2</sup>. Risk of bias across studies was evaluated with Funnel and Doi plots.<sup>12,13</sup> Sensitivity analyses were made to evaluate the robustness of the prevalence estimates. These prevalence estimates were used to evaluate the positive predictive value (PPV) and the negative predictive value (NPV) given the calculated diagnostic test accuracy measures. To further understand the PPV and the NPV in different scenarios, we evaluated the consequences of increasing and decreasing the disease prevalence on the PPV and the NPV.

**eTable 1.** Methods for Index and Reference Test in Included Studies

| <b>Reference</b>    | <b>Index test method</b>                                                                                                                                                           | <b>Index test with pupillary dilation?</b> | <b>Reference test method</b>                                                                                                                                 | <b>Reference test with pupillary dilation?</b> |
|---------------------|------------------------------------------------------------------------------------------------------------------------------------------------------------------------------------|--------------------------------------------|--------------------------------------------------------------------------------------------------------------------------------------------------------------|------------------------------------------------|
| Ludwig et al., 2018 | Pediatrician performed the RRT, and the study extracted results from patient journals.                                                                                             | No                                         | Digital images were taken of the externa, the iris, and the fundus. Eyes were dilated. Images were interpreted by ophthalmologists.                          | Yes                                            |
| Ma et al. 2018      | Pediatrician performed the RRT using a direct ophthalmoscope.                                                                                                                      | No                                         | Digital images were taken of the anterior and the posterior segment. Eyes were dilated. Images were interpreted by ophthalmologists.                         | Yes                                            |
| Mussavi et al. 2014 | Pediatrician performed the RRT with an indirect ophthalmoscope without dilation. Redness was scored in 0–10 (0=milky white/asymmetry; 10=bold red). Only 10 was considered normal. | No                                         | Eyes were dilated and examined by an ophthalmologist in a dark room.                                                                                         | Yes                                            |
| Sun et al. 2016     | Pediatric ophthalmologists performed the RRT using a direct ophthalmoscope.                                                                                                        | No                                         | Eyes were examined using a hand-held slit lamp. Images were taken of the anterior and the posterior segment. Images were examined onsite by ophthalmologist. | Yes                                            |
| Viquez & Wu, 2020   | An ophthalmologist performed the Brückner test.                                                                                                                                    | No                                         | Eyes were examined by an ophthalmologist.                                                                                                                    | Yes                                            |

Abbreviations: RRT = red reflex test.

**eTable 2.** Risk of Bias Within Individual Studies

| <b>Reference</b>    | <b>Patient Selection: Risk of Bias</b> | <b>Patient Selection: Applicability</b> | <b>Index Test: Risk of Bias</b> | <b>Index Test: Applicability</b> | <b>Reference Standard: Risk of Bias</b> | <b>Reference Standard: Applicability</b> | <b>Flow and Timing: Risk of Bias</b> |
|---------------------|----------------------------------------|-----------------------------------------|---------------------------------|----------------------------------|-----------------------------------------|------------------------------------------|--------------------------------------|
| Ludwig et al., 2018 | U                                      | L                                       | L                               | L                                | L                                       | U                                        | L                                    |
| Ma et al. 2018      | U                                      | L                                       | L                               | L                                | L                                       | U                                        | H                                    |
| Mussavi et al. 2014 | L                                      | L                                       | L                               | U                                | L                                       | L                                        | H                                    |
| Sun et al. 2016     | H                                      | U                                       | L                               | L                                | L                                       | L                                        | L                                    |
| Viquez & Wu, 2020   | L                                      | U                                       | L                               | L                                | H                                       | L                                        | L                                    |

Signs for evaluating risk of bias: L: low; U: unclear. H: high.

**eTable 3.** Sensitivity Analyses of the Bivariate Meta-analysis of the Diagnostic Test Accuracy of the Red Reflex on Detecting Any Ocular Pathology

| <b>Excluded study</b> | <b>Sensitivity (95% CI)</b> | <b>Specificity (95% CI)</b> |
|-----------------------|-----------------------------|-----------------------------|
| Ludwig et al., 2018   | 18 % (2–69 %)               | 93 % (60–99 %)              |
| Ma et al. 2018        | 14 % (14–14 %)              | 95 % (95–95 %)              |
| Mussavi et al. 2014   | 4 % (1–23 %)                | 100 % (83–100 %)            |
| Sun et al. 2016       | 6 % (0.1–70 %)              | 98 % (57–100 %)             |
| Viquez & Wu, 2020     | 5 % (0.1–63 %)              | 99 % (66–100 %)             |

**eTable 4.** Sensitivity Analyses of the Bivariate Meta-analysis of the Diagnostic Test Accuracy of the Red Reflex on Detecting Any Medical or Surgical Intervention–Demanding Ocular Pathology

| <b>Excluded study</b> | <b>Sensitivity (95% CI)</b> | <b>Specificity (95% CI)</b> |
|-----------------------|-----------------------------|-----------------------------|
| Ma et al. 2018        | 62 % (0.2–100 %)            | 95 % (83–98 %)              |
| Sun et al. 2016       | 56 % (0.7–100 %)            | 98 % (73–100 %)             |
| Viquez & Wu, 2020     | 6 % (2–17 %)                | 99 % (95–100 %)             |



**Figure 1.** Calculated Summary Prevalence Estimate of Any Ocular Pathology, Risk of Bias Across Studies, and Sensitivity Analyses

Prevalence estimate:

| Study               | Prevalence | LCI 95% | HCI 95% | weight (%) |
|---------------------|------------|---------|---------|------------|
| Ludwig et al. 2018  | 25%        | 19%     | 32%     | 15%        |
| Ma et al. 2018      | 34%        | 30%     | 38%     | 22%        |
| Mussavi et al. 2014 | 24%        | 19%     | 29%     | 18%        |
| Sun et al. 2016     | 29%        | 27%     | 30%     | 31%        |
| Viquez & Wu, 2020   | 22%        | 15%     | 29%     | 13%        |
| Pooled              | 27%        | 24%     | 31%     | 100%       |
| Statistics          |            |         |         |            |
| I-squared           | 70.13      | 23.82   | 88.29   |            |
| Cochran's Q         | 13.39      |         |         |            |
| Chi2, p             | 0.01       |         |         |            |
| tau2                | 0.00       |         |         |            |

Risk of bias across studies:

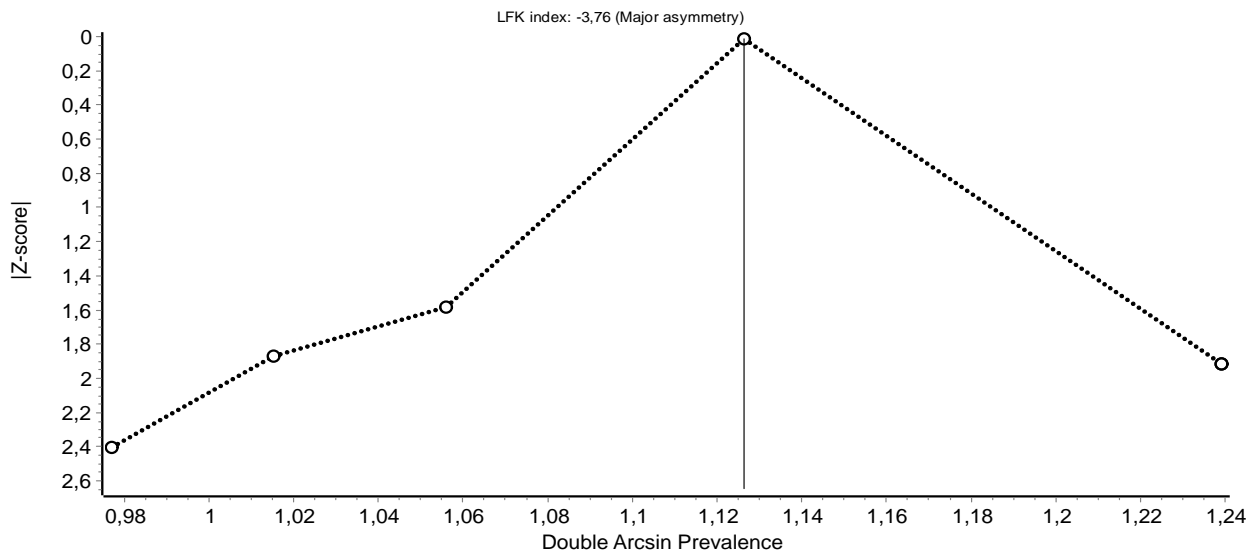

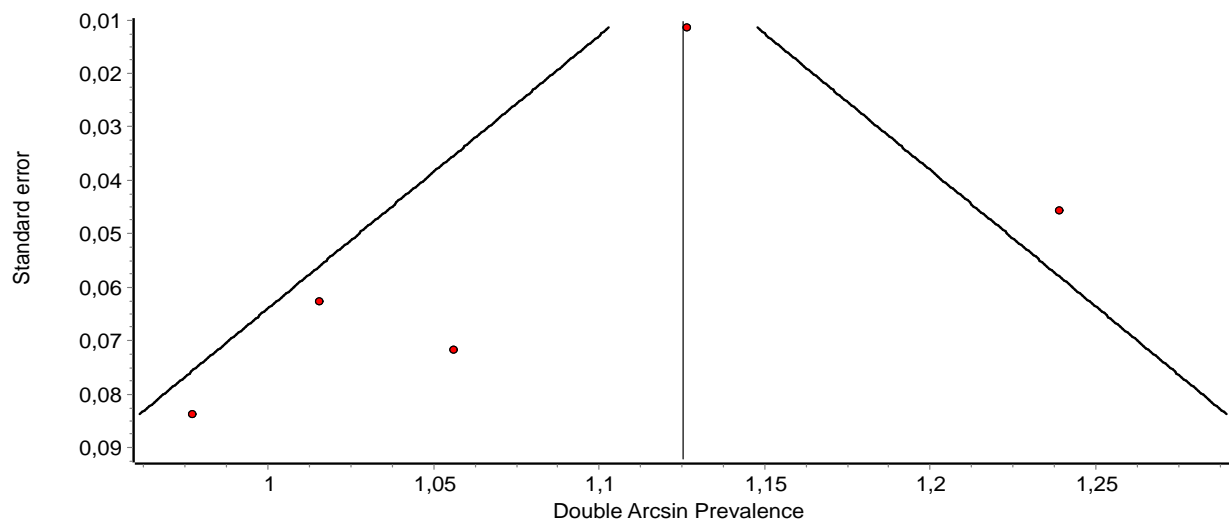

Sensitivity analysis:

| Excluded study      | Pooled Prevalence | LCI 95% | HCI 95% | Cochran Q | p    | I <sup>2</sup> | I <sup>2</sup> LCI 95% | I <sup>2</sup> HCI 95% |
|---------------------|-------------------|---------|---------|-----------|------|----------------|------------------------|------------------------|
| Ludwig et al. 2018  | 28%               | 24%     | 32%     | 12.43     | 0.01 | 75.87          | 33.55                  | 91.24                  |
| Ma et al. 2018      | 26%               | 22%     | 29%     | 6.81      | 0.08 | 55.96          | 0.00                   | 85.41                  |
| Mussavi et al. 2014 | 28%               | 24%     | 32%     | 10.20     | 0.02 | 70.59          | 15.82                  | 89.73                  |
| Sun et al. 2016     | 26%               | 21%     | 32%     | 13.32     | 0.00 | 77.48          | 38.87                  | 91.71                  |
| Viquez & Wu, 2020   | 28%               | 25%     | 32%     | 10.20     | 0.02 | 70.60          | 15.84                  | 89.73                  |

**eFigure 2.** Calculated Summary Prevalence Estimate of Medical or Surgical Intervention–Demanding Ocular Pathology, Risk of Bias Across Studies, and Sensitivity Analyses

Prevalence estimate:

| Study               | Prevalence | LCI 95% | HCI 95% | weight (%) |
|---------------------|------------|---------|---------|------------|
| Ludwig et al. 2018  | 0.0%       | 0.0%    | 0.9%    | 16%        |
| Ma et al. 2018      | 2.5%       | 1.3%    | 4.1%    | 22%        |
| Mussavi et al. 2014 | 0.0%       | 0.0%    | 0.7%    | 18%        |
| Sun et al. 2016     | 1.4%       | 1.2%    | 1.7%    | 29%        |
| Viquez & Wu, 2019   | 1.4%       | 0.0%    | 4.2%    | 14%        |
| Pooled              | 0.9%       | 0.2%    | 2.0%    | 100%       |
| Statistics          |            |         |         |            |
| I-squared           | 76.17      | 41.81   | 90.24   |            |
| Cochran's Q         | 16.79      |         |         |            |
| Chi2, p             | 0.00       |         |         |            |
| tau2                | 0.01       |         |         |            |

Risk of bias across studies:

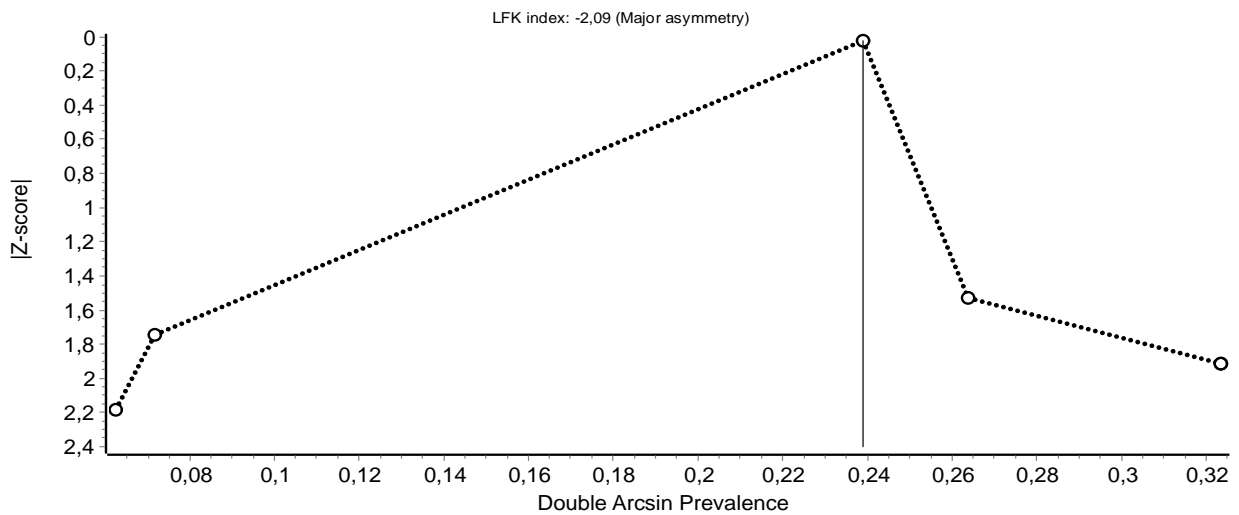

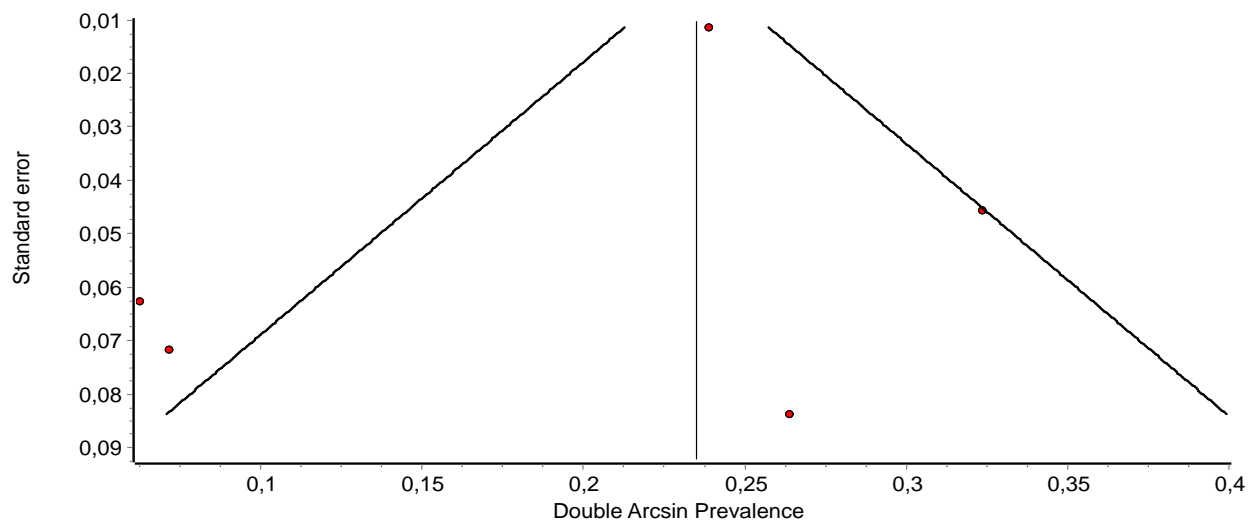

Sensitivity analysis:

| Excluded study      | Pooled Prevalence | LCI 95% | HCI 95% | Cochran Q | p    | I <sup>2</sup> | I <sup>2</sup> LCI 95% | I <sup>2</sup> HCI 95% |
|---------------------|-------------------|---------|---------|-----------|------|----------------|------------------------|------------------------|
| Ludwig et al. 2018  | 1.2%              | 0.4%    | 2.4%    | 11.48     | 0.01 | 73.86          | 26.82                  | 90.66                  |
| Ma et al. 2018      | 0.5%              | 0.0%    | 1.7%    | 12.81     | 0.01 | 76.57          | 35.87                  | 91.44                  |
| Mussavi et al. 2014 | 1.3%              | 0.5%    | 2.4%    | 8.95      | 0.03 | 66.49          | 1.92                   | 88.55                  |
| Sun et al. 2016     | 0.8%              | 0.0%    | 2.4%    | 15.88     | 0.00 | 81.11          | 50.63                  | 92.77                  |
| Viquez & Wu, 2019   | 0.8%              | 0.1%    | 1.9%    | 16.67     | 0.00 | 82.00          | 53.45                  | 93.04                  |

**eFigure 3.** Hierarchical Summary Receiver Operating Characteristics Model (HSROC) Curve for Evaluating the Association Between Sensitivity and Specificity for the Red Reflex in Identifying Ocular Pathology

any ocular pathology (left) and any medical or surgical intervention demanding ocular pathology (right)

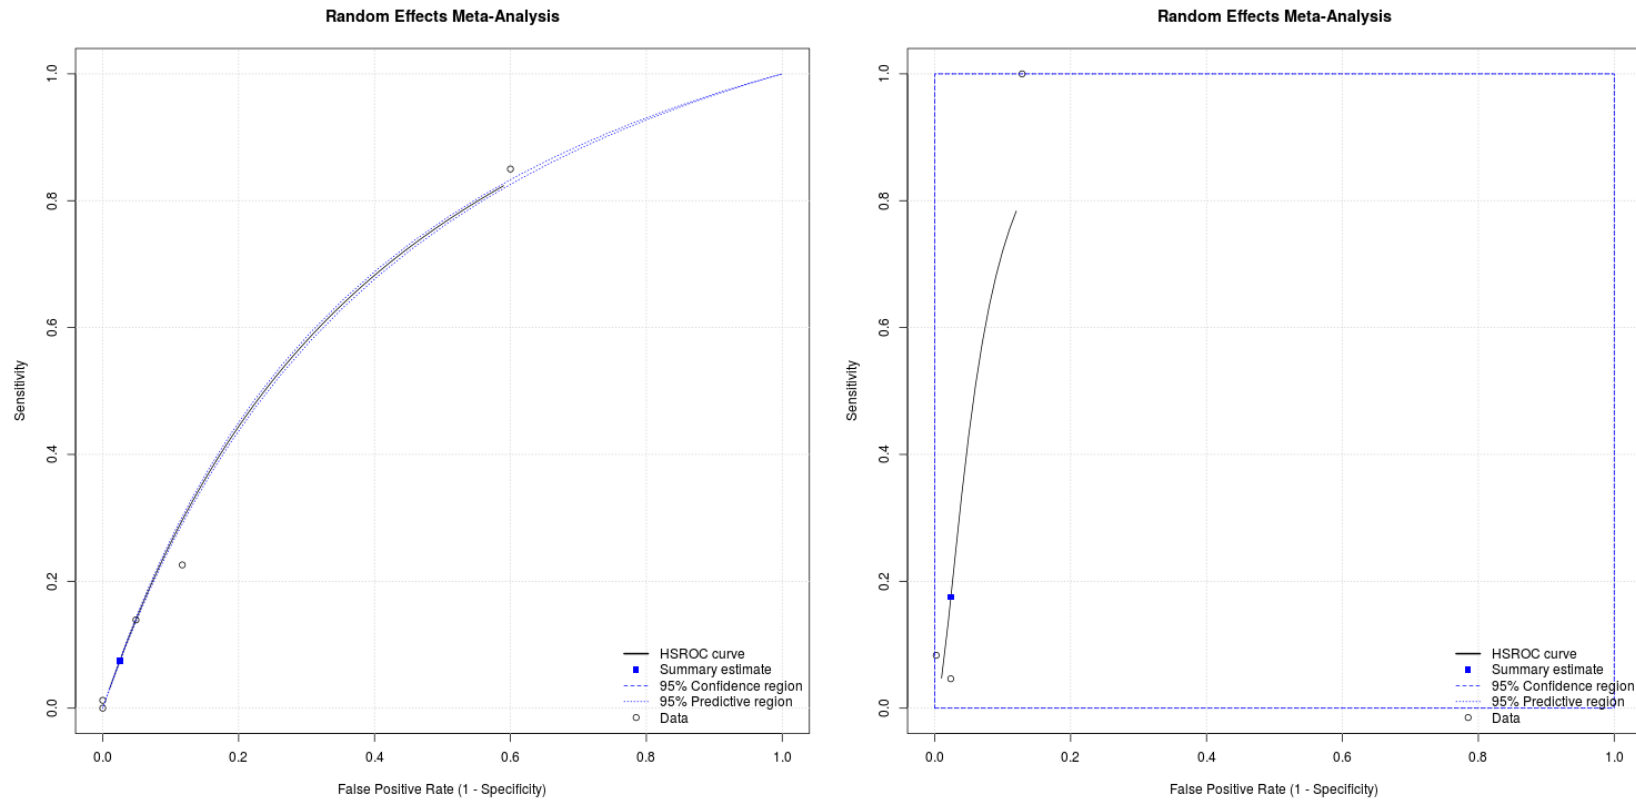

Supplement: jamaophthalmol-e204854-s001.pdf [file jamaophthalmol-e204854-s001.pdf]
